# Supplementary material
Source: PubMed Central journal article supplement (PMC9344861)
Supplement: NIHMS1706048-supplement-Supplementary_Figure_1.pdf [file NIHMS1706048-supplement-Supplementary_Figure_1.pdf]

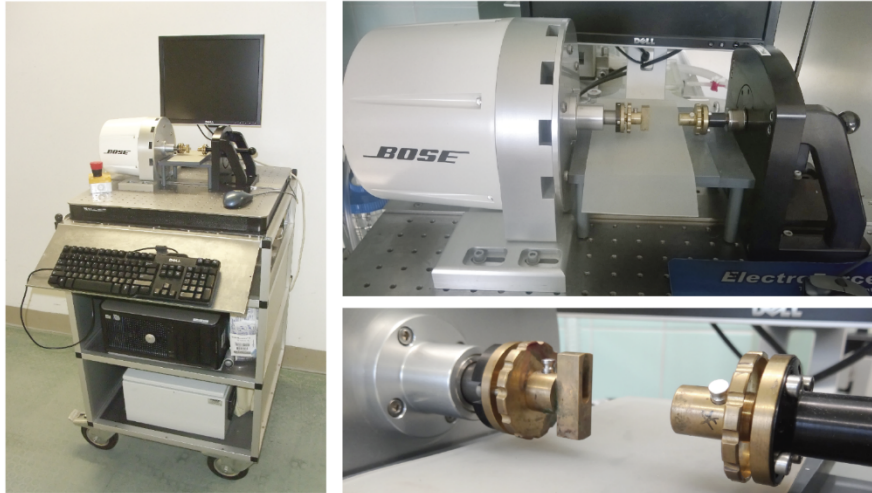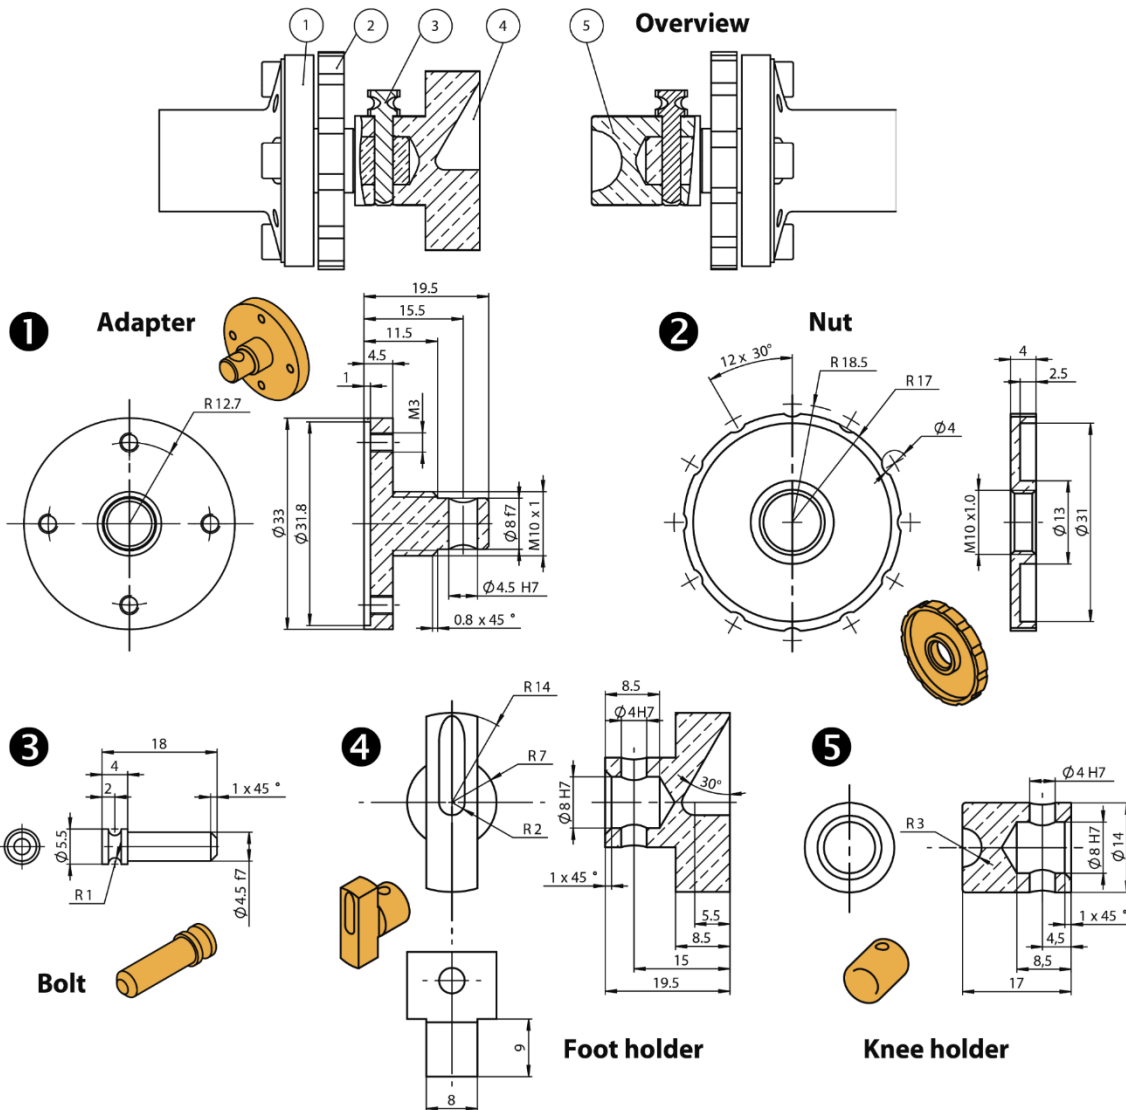

Supplementary Figure 1: Example of loading device with dimensions for the foot and knee fixtures<sup>42</sup>.
